# Supplementary material for: Lactobacillus extracellular vesicles alleviate alcohol-induced liver injury in mice by regulating gut microbiota and activating the Nrf-2 signaling pathway
Source: Royal Society of Chemistry journal article supplement (doi:10.1039/d4fo04364b), 2025-01-01

## Supplementary information

### 1) Original results of SDS-PAGE

**Figure. 1 L**

Electrophoretic gel

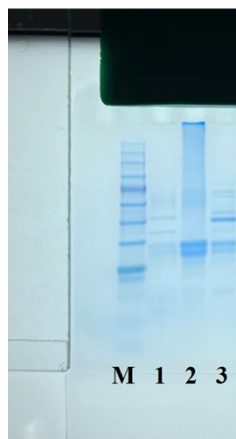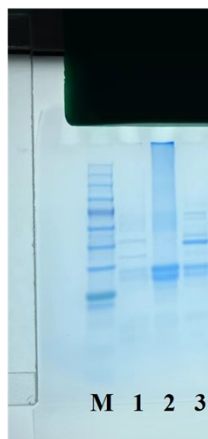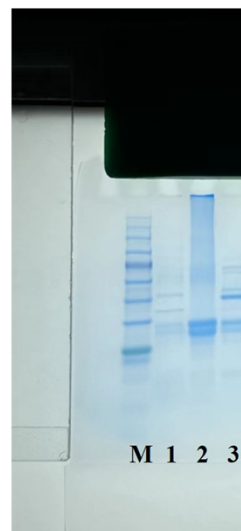

## 2) Original results of Western Blot

### The first repetition of the experiments

Figure. 7 A

cytoplasmic Nrf-2

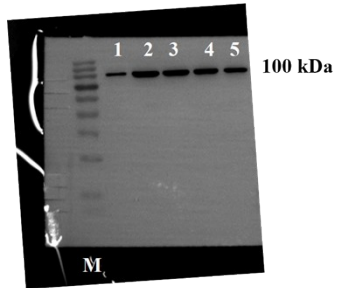

CYP2E1

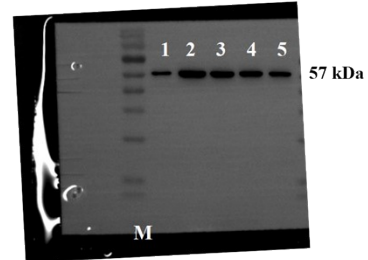

cytoplasmic HO-1

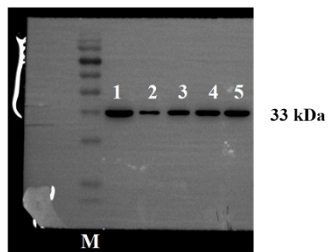

nuclear Nrf-2

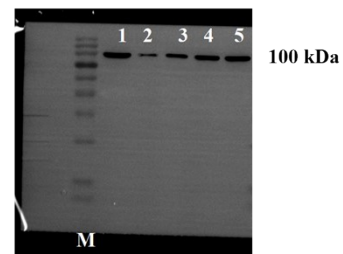

$\beta$ -actin

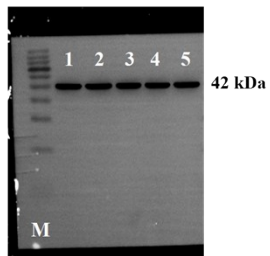

Histone H3

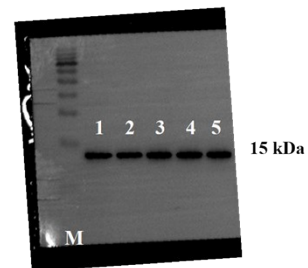

## The second repetition of the experiments

cytoplasmic Nrf-2

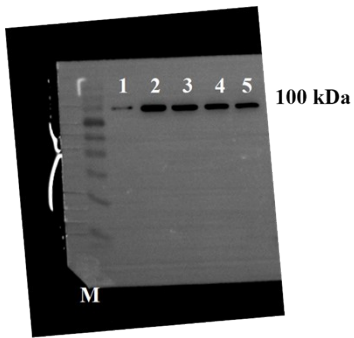

CYP2E1

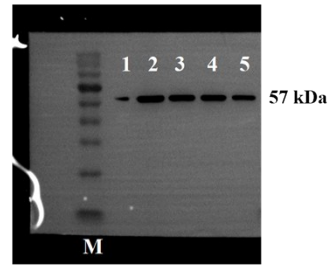

cytoplasmic HO-1

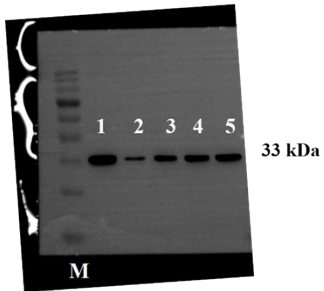

nuclear Nrf-2

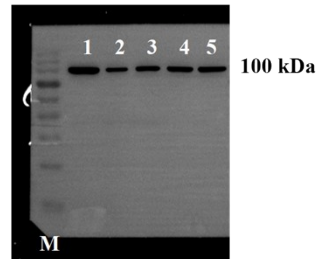

$\beta$ -actin

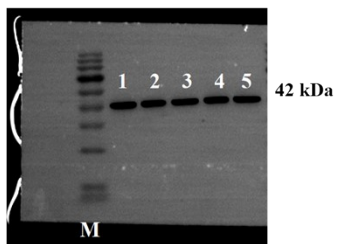

Histone H3

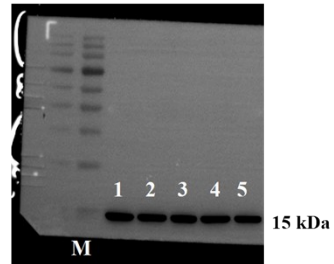

## The third repetition of the experiments

cytoplasmic Nrf-2

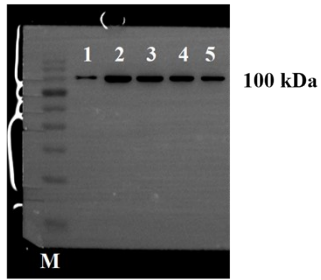

CYP2E1

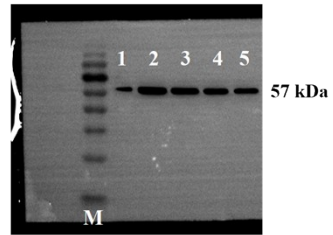

cytoplasmic HO-1

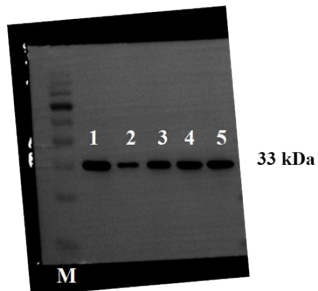

nuclear Nrf-2

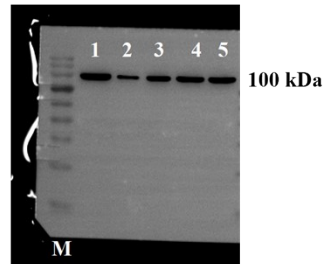

$\beta$ -actin

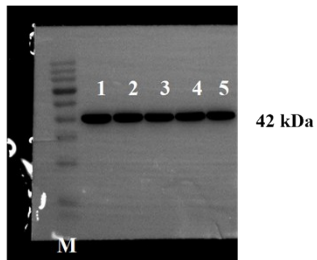

Histone H3

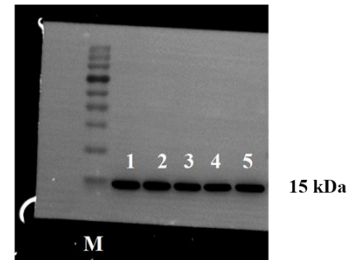

Supplement: d4fo04364b1.pdf [file d4fo04364b1.pdf]
